# Supplementary material for: An early Aurignacian arrival in southwestern Europe
Source: Springer Nature journal article supplement (doi:10.1038/s41559-018-0753-6), 2018-12-21
Supplement: 41559_2018_753_MOESM1_ESM.pdf [file 41559_2018_753_MOESM1_ESM.pdf]

In the format provided by the authors and unedited.

# An early Aurignacian arrival in southwestern Europe

**Miguel Cortés-Sánchez<sup>1,2</sup>, Francisco J. Jiménez-Espejo<sup>3,4\*</sup>, María D. Simón-Vallejo<sup>1,2</sup>,  
Chris Stringer<sup>5</sup>, María Carmen Lozano Francisco<sup>2</sup>, Antonio García-Alix<sup>4,6</sup>,  
José L. Vera Peláez<sup>2</sup>, Carlos P. Odriozola<sup>1,2</sup>, José A. Riquelme-Cantal<sup>7</sup>, Rubén Parrilla Giráldez<sup>2</sup>,  
Adolfo Maestro González<sup>8</sup>, Naohiko Ohkouchi<sup>3</sup> and Arturo Morales-Muñiz<sup>9</sup>**

---

<sup>1</sup>Departamento de Prehistoria y Arqueología, Facultad de Geografía e Historia, Universidad de Sevilla, Seville, Spain. <sup>2</sup>HUM-949 Research Group, Departamento de Prehistoria y Arqueología, Facultad de Geografía e Historia, Universidad de Sevilla, Seville, Spain. <sup>3</sup>Japan Agency for Marine-Earth Science and Technology, Yokosuka, Japan. <sup>4</sup>Instituto Andaluz de Ciencias de la Tierra, CSIC-UGR, Armilla, Spain. <sup>5</sup>Department of Earth Sciences, Natural History Museum, London, UK. <sup>6</sup>Departamento de Estratigrafía y Paleontología, Facultad de Ciencias, Universidad de Granada, Granada, Spain. <sup>7</sup>Departamento de Geografía y Ciencias del Territorio, Universidad de Córdoba, Córdoba, Spain. <sup>8</sup>Instituto Geológico y Minero de España, Madrid, Spain. <sup>9</sup>Laboratorio de Arqueozooarqueología, Departamento de Biología, Universidad Autónoma de Madrid, Madrid, Spain. \*e-mail: [fjjspejo@ugr.es](mailto:fjjspejo@ugr.es)

1

2 **Supplementary Information** is linked to the online version of the paper at xx.

### 3 **Supplementary Information**

4

5 Cortés-Sánchez, M., Jiménez-Espejo, F.J., Simón-Vallejo, M.D., Stringer, C., Lozano-Francisco,  
6 M.C., García-Alix, A., Vera-Peláez, J.L., Odriozola Lloret, C., Riquelme-Cantal, J.A., Parrilla  
7 Giráldez, R., Maestro González, A., Ohkouchi, N., Morales-Muñiz, A. An early Aurignacian  
8 arrival in southwestern Europe. *Nature Ecology and Evolution*.

9

10 References used for manuscript Figure 1: Western Europe and North Africa map  
11 reconstruction modified from Ehlers et al. 2011 with coastline at -85m sea level with  
12 elevations. References used for manuscript Figure 1: Western Europe and North Africa map  
13 reconstruction modified from Ehlers et al. 2011 with coastline at -85m sea level with  
14 elevations 3. Bajondillo (this paper), 9. Romaní, 10. Arbreda, 11. Isturitz, 12. Labeko, 13. La  
15 Viña, 15. Castanet, 16. Pataud, 17. Les Cottés, 18. Riparo Mochi, 19. Geißenklösterle, 20.  
16 Fumane, and 21. Serino (Wood et al., 2014 with references), 14. Kent's (Higham et al.,  
17 2011), , 23. Peshtera/Kozarnika (Fu et al., 2016); Early Upper Palaeolithic sites with ages <42 ka  
18 cal BP in the Iberian Peninsula and North Africa (yellow): 1. Pego do Diabo (Zilhão et al.,  
19 2010), 2. Gorham's (Higham et al., 2012), 4. Ventanas and Carigüela (this paper), 5. La Boja  
20 (Zilhão et al., 2017), 6. Cendres (Villaverde et al., 2017), 7. Foradada and 8. Mallaetes  
21 (Villaverde et al. 2017 with references). African sites: 23. Haua Fteah (Douka et al., 2014), 24.  
22 Grotte des Pigeons (Taforalt) (Barton et al., 2007), 25. Benzú (Ramos et al., 2008), and 26. Jebel  
23 Irhoud (Hublin et al., 2017).

24

25

26

27

28

| Archaeol. Layer<br>(age cal BP)<br><u>Techno-<br/>complex</u>    | Sample                  | Laboratory<br>code | Method/<br>Treatment         | Calibration<br>curve | Radiocarbon<br>Age<br>(2σ) | $\delta^{13}\text{C}^0/_{\text{oo}}$ | Lower<br>Cal yr BP<br>$^{14}\text{C}=2\sigma$<br>TL=1σ | Upper<br>Cal yr BP<br>$^{14}\text{C}=2\sigma$<br>TL=1σ | Median | Lower<br>Bayesian<br>Modelled<br>Cal yr BP | Upper<br>Bayesian<br>Modelled<br>Cal yr BP | Median | Sample<br>location<br>Supp. Inf.<br>Fig. 1d |
|------------------------------------------------------------------|-------------------------|--------------------|------------------------------|----------------------|----------------------------|--------------------------------------|--------------------------------------------------------|--------------------------------------------------------|--------|--------------------------------------------|--------------------------------------------|--------|---------------------------------------------|
| Bj/10<br>(c. 32.1-<22 ka)<br><u>Gravettian</u>                   | Burnt flint             | MAD-2470           | TL                           |                      |                            |                                      | 26997                                                  | 21691                                                  |        |                                            |                                            |        | 20                                          |
|                                                                  | <i>Patella</i> sp.      | CNA-3819.1.1       | $^{14}\text{C}$ -<br>AMS/ABA | Marine13.14c         | 28660±120                  | -1.81±1.50                           | 32634                                                  | 31605                                                  | 32098  | 32380                                      | 31540                                      | 31920  | 21                                          |
| Boundary Start<br>Bj/10                                          |                         |                    |                              |                      |                            |                                      |                                                        |                                                        |        | 32583                                      | 31643                                      | 32093  |                                             |
| Boundary end<br>Bj/11                                            |                         |                    |                              |                      |                            |                                      |                                                        |                                                        |        | 32832                                      | 31863                                      | 32366  |                                             |
| Bj/11<br>(ca. 37.6-32.4<br>ka)<br><u>Evolved<br/>Aurignacian</u> | Burnt flint             | MAD-2482           | TL                           |                      |                            |                                      | 28790                                                  | 23236                                                  |        |                                            |                                            |        | 2                                           |
|                                                                  | Burnt flint             | MAD-2559           | TL                           |                      |                            |                                      | 33687                                                  | 25685                                                  |        |                                            |                                            |        | 10                                          |
|                                                                  | <i>Mytilus edulis</i>   | CNA-3821.1.1       | $^{14}\text{C}$ -<br>AMS/ABA | Marine13.14c         | 28880±240                  | 0.7±1.5                              | 33197                                                  | 31636                                                  | 32433  | 33345                                      | 32156                                      | 32726  | 5                                           |
|                                                                  | <i>Mytilus edulis</i>   | CNA-3820.1.1       | $^{14}\text{C}$ -<br>AMS/ABA | Marine13.14c         | 28970±240                  | -3.96±1.50                           | 33340                                                  | 31744                                                  | 32577  | 33413                                      | 32205                                      | 32787  | 3                                           |
|                                                                  | <i>Mytilidae</i> sp.    | CNA-3878.1.1       | $^{14}\text{C}$ -<br>AMS/ABA | Marine13.14c         | 29040±220                  | 2.10±1.50                            | 33400                                                  | 31870                                                  | 32699  | 33441                                      | 32266                                      | 32835  | 1                                           |
|                                                                  | <i>Mytilidae</i> sp.    | CNA-3817.1.1       | $^{14}\text{C}$ -<br>AMS/ABA | Marine13.14c         | 29180±240                  | -0.10±1.50                           | 33591                                                  | 32062                                                  | 32917  | 33582                                      | 32385                                      | 32983  | 6                                           |
|                                                                  | cf. <i>Otala</i> sp.    | CNA-3883.1.1       | $^{14}\text{C}$ -<br>AMS/ABA | IntCal13.14c         | 31280±280                  | -1.70±1.50                           | 35805                                                  | 34638                                                  | 35181  | 35805                                      | 34635                                      | 35181  | 4                                           |
|                                                                  | <i>Mytilidae</i> sp.    | CNA-3876.1.1       | $^{14}\text{C}$ -<br>AMS/ABA | Marine13.14c         | 32780±340                  | -2.51±1.50                           | 37424                                                  | 35520                                                  | 36313  | 37191                                      | 35474                                      | 36258  | 9                                           |
|                                                                  | Carbonac/<br>ash sedim. | Ua-18050           | $^{14}\text{C}$ /AMS         | IntCal13.14c         | 32770±1065                 | -23.2                                | 39725                                                  | 34809                                                  | 37112  | 38323                                      | 34719                                      | 36369  | 7                                           |
|                                                                  | Carbonac/<br>ash sedim. | Ua-17150           | $^{14}\text{C}$ /AMS         | IntCal13.14c         | 33690±1195                 | -23.6                                | 41068                                                  | 35579                                                  | 38117  | 38683                                      | 35034                                      | 36695  | 8                                           |
| Boundary Start<br>Bj/11                                          |                         |                    |                              |                      |                            |                                      |                                                        |                                                        |        | 39953                                      | 36028                                      | 37607  |                                             |
| Boundary End<br>Bj/13                                            |                         |                    |                              |                      |                            |                                      |                                                        |                                                        |        | 41586                                      | 39161                                      | 40826  |                                             |

Supplementary Information Table 1. Radiocarbon accelerator and thermoluminescence (TL) dates from Bajondillo.

| Archaeol. Layer<br>(age cal BP)                                                                                                      | Sample                  | Laboratory<br>code       | Method/<br>Treatment        | Calibration<br>curve | Radiocarbon<br>Age | $\delta^{13}\text{C}^0/_{\text{oo}}$ | Lower<br>Cal yr BP | Upper<br>Cal yr BP | Median | Lower<br>Bayesian | Upper<br>Bayesian | Median | Sample<br>location |
|--------------------------------------------------------------------------------------------------------------------------------------|-------------------------|--------------------------|-----------------------------|----------------------|--------------------|--------------------------------------|--------------------|--------------------|--------|-------------------|-------------------|--------|--------------------|
| Bj/13<br>(ca. 43.0-40.8<br>ka)<br><br>Early<br>Aurignacian                                                                           | <i>Mytilidae</i><br>sp. | <b>CNA-<br/>3218.1.2</b> | <sup>14</sup> C-<br>AMS/ABA | Marine13.14c         | <b>36890±200</b>   | 5.04±1.5                             | 41589              | 40633              | 41145  | 41660             | 40767             | 41243  | -                  |
|                                                                                                                                      | cf. <i>Otala</i><br>sp. | <b>CNA-<br/>3216.3.1</b> | <sup>14</sup> C-<br>AMS/ABA | IntCal13.14c         | <b>36890±210</b>   | -6.27±1.5                            | 41895              | 41080              | 41496  | 41893             | 41120             | 41511  | 15                 |
|                                                                                                                                      | Charcoal                | <i>Ua-18270</i>          | <sup>14</sup> C-AMS         | IntCal13.14c         | <i>37005±1790</i>  | -23.8                                | 45768              | 38346              |        |                   |                   |        | 11                 |
|                                                                                                                                      | <i>Mytilidae</i><br>sp. | <b>CNA-<br/>3873.1.1</b> | <sup>14</sup> C-<br>AMS/ABA | Marine13.14c         | <b>37430±570</b>   | 5.84±1.50                            | 42430              | 40517              | 41550  | 42399             | 40803             | 41615  | 14                 |
|                                                                                                                                      | <i>Mytilidae</i><br>sp. | <b>CNA-<br/>3213.3.2</b> | <sup>14</sup> C-<br>AMS/ABA | Marine13.14c         | <b>38160±230</b>   | 0.86±0.02                            | 42447              | 41720              | 42083  | 42427             | 41702             | 42066  | 13                 |
|                                                                                                                                      | Charcoal                | <b>CNA-<br/>3882.1.2</b> | <sup>14</sup> C-AMS-<br>ABA | IntCal13.14c         | <b>39270±870</b>   | -24.64±1.50                          | 44778              | 42008              | 43216  | 43710             | 41602             | 42523  | 14                 |
| Boundary Start<br>Bj/13                                                                                                              |                         |                          |                             |                      |                    |                                      |                    |                    |        | 44918             | 41878             | 42959  |                    |
| Boundary end<br>Bj/14                                                                                                                |                         |                          |                             |                      |                    |                                      |                    |                    |        | 47515             | 43903             | 46039  |                    |
| Bj/14<br>(ca. >50-46.0<br>ka)<br><br>Mousterian                                                                                      | Burnt flint             | <i>MAD-2463</i>          | TL                          |                      |                    |                                      | 34369              | 22733              |        |                   |                   |        | 19                 |
|                                                                                                                                      | <i>Mytilidae</i><br>sp. | <b>CNA-<br/>3211.1.1</b> | <sup>14</sup> C-<br>AMS/ABA | Marine13.14c         | <b>43840±490</b>   | 0.43±0.03                            | 47868              | 45656              | 46649  | 47748             | 45787             | 46685  | -                  |
|                                                                                                                                      | cf. <i>Otala</i><br>sp. | <b>CNA-<br/>3881.1.1</b> | <sup>14</sup> C-<br>AMS/ABA | IntCal13.14c         | <b>42710±1120</b>  | -10.34±1.50                          | 48901              | 44259              | 46216  | 48163             | 45168             | 46633  | 16                 |
|                                                                                                                                      | Carbonac/<br>ash sedim. | <i>Ua-16859</i>          | <sup>14</sup> C-AMS         | IntCal13.14c         | <i>&gt;40.000</i>  | -23.9                                |                    |                    |        |                   |                   |        | 18                 |
|                                                                                                                                      | <i>Mytilidae</i><br>sp. | <b>CNA-<br/>3875.1.1</b> | <sup>14</sup> C-<br>AMS/ABA | Marine13.14c         | <b>44020±1290</b>  | -0.85±1.50                           | 49750              | 45083              | 47117  | 48470             | 45418             | 46768  | 17                 |
|                                                                                                                                      | Bivalvia sp.            | <b>CNA-<br/>3880.1.1</b> | <sup>14</sup> C-<br>AMS/ABA | Marine13.14c         | <b>46610±1740</b>  | 5.53±1.50                            |                    | >46695             | 48732  | 49048             | 45753             | 47013  | 19                 |
|                                                                                                                                      | <i>Mytilidae</i><br>sp. | <b>CNA-<br/>4168.1.1</b> | <sup>14</sup> C-<br>AMS/ABA | Marine13.14c         | <b>46890±1810</b>  | 3.38±1.50                            |                    | >49497             |        |                   |                   |        |                    |
|                                                                                                                                      | <i>Mytilidae</i><br>sp. | <b>CNA-<br/>3822.1.1</b> | <sup>14</sup> C-<br>AMS/ABA | Marine13.14c         | <b>48410±2420</b>  | -1.77±1.50                           |                    | >49871             |        |                   |                   |        |                    |
| <b>Supplementary Information Table 1. (Continuation). Radiocarbon accelerator and thermoluminescence (TL) dates from Bajondillo.</b> |                         |                          |                             |                      |                    |                                      |                    |                    |        |                   |                   |        |                    |

30 **Supplementary Information Table 1. . Radiocarbon accelerator and thermoluminescence (TL)**  
31 **dates from Bajondillo.** Radiocarbon accelerator and thermoluminescence (TL) dates from  
32 Bajondillo for this study (bold) and from pilot study (cursive) (Cortés et al., 2007). Laboratory  
33 codes: Ua: Ånström laboratory, University of Uppsala (Sweden); CNA: National Center for  
34 Accelerators (Spain); MAD: Dating and Radiochemistry Laboratory, Universidad Autónoma de  
35 Madrid. Acronym codes: <sup>14</sup>C-AMS: radiocarbon dating; TL: thermoluminescence dating; ABA:  
36 acid and base leaching. Radiocarbon has been calibrated using Oxcal 4.3 software  
37 (<https://c14.arch.ox.ac.uk/oxcal.html>) along with Intcal13 and marine13 curves (Reimer et al.,  
38 2013; Ramsey, 2009). The local variation of the reservoir age, estimated from recent samples,  
39 in the westernmost Mediterranean is 280+36 yr (Siani et al., 2000). However, it is not applied  
40 to the calibration of marine samples from Bajondillo site because this value is unknown for the  
41 Mediterranean Sea during from 50 to 20 ky (glacial period), and apply the present reservoir  
42 effect have a nil effect on the obtained calibrated values. Dates provided as calibrated years  
43 before present (cal yr BP), plotted with age uncertainties of 2σ and the median value. Dates  
44 obtained from Bayesian analysis (Oxcal 4.3 software, <https://c14.arch.ox.ac.uk/oxcal.html>) are  
45 provided as calibrated years before present (cal yr BP), plotted with age uncertainties of 2σ  
46 and the median value. Note that the boundaries between phases have been obtained by  
47 means of Bayesian analysis as well, except for the beginning of Bj/14, since older dates of 50  
48 cal ka BP were obtained at the bottom of the sequence, and the end of Bj/10 , where only two  
49 dates were obtained. Radiocarbon dates with high analytical error (Ua-18270: 37005±1790 yr  
50 BP; CNA-4168.1.1: 46890±1810 yr BP; CNA-3822.1.1: 48410±2420 yr BP) and with unquantified  
51 analytical error (Ua-16859: >40.000 yr BP) as well as TL ages (high uncertainty in age) have not  
52 been included in the Bayesian model.

53

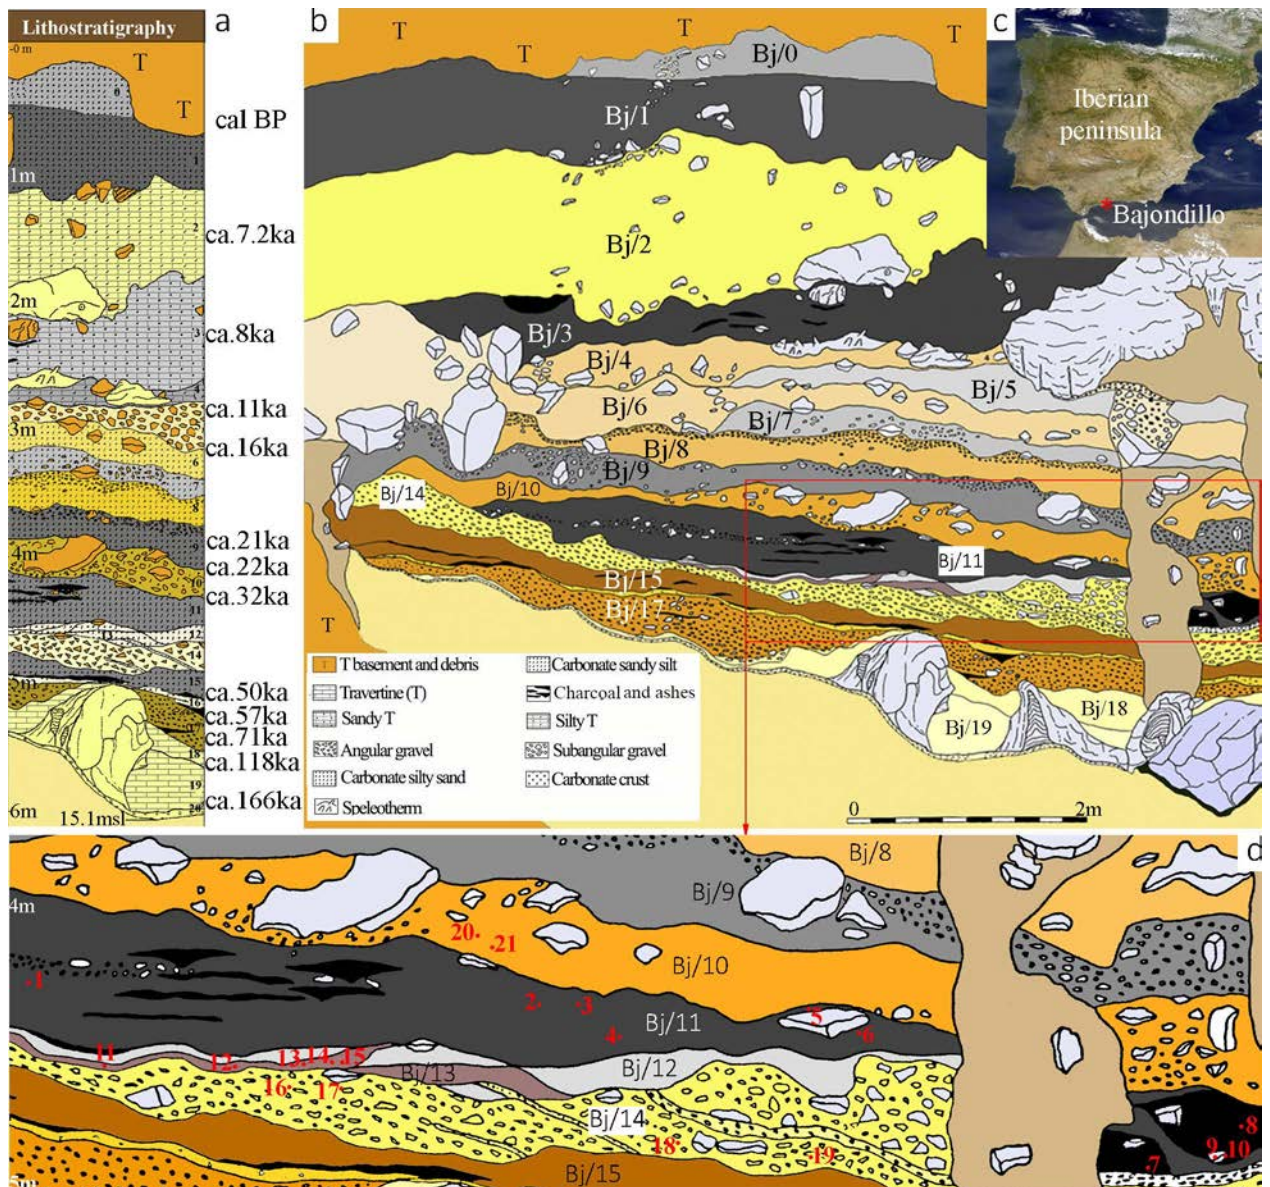

54

55

56 **Supplementary Figure 1.** a) Detail of Bajondillo site Central section from the West profile. b)  
 57 Stratigraphic sequence of Bajondillo (the chronology of the lithostratigraphic column  
 58 incorporates data from another 24  $^{14}\text{C}$ /AMS and U/Th dates from other levels not included in  
 59 this paper) (see Cortés, 2007, Cortés et al., 2011, and unpublished data). c) Location of  
 60 Bajondillo site. d) Detail of Middle-Palaeolithic to Early Upper Palaeolithic levels with location  
 61 of the samples that have been dated (Supplementary Table 1).

62

63

64 All dated samples were taken from locations where no traces of alteration processes were  
65 visible. The sedimentary features of Bj/14 and Bj/13 allow one to readily distinguish levels on  
66 account of the following criteria (Bergadà and Cortés, 2007):

67 - Bj/14: a ca. 20 cm–deep deposit of 1-5 cm rock fragments from travertine of subangulose  
68 morphology that are fragmented and cracked (fissured) and almost devoid of matrix (3% of  
69 sand 10YR 6/4).

70 - Bj/13: a ca. 16 cm – deep deposit. Built on a brown matrix of limose sands (10 YR 6/3) where  
71 the coarse fraction of the sediment represents ca. 10% of the bulk.

72 - Bj/12: a ca. 18 cm – deep deposit. Granulometrically indistinguishable from Bj/13, its greyish  
73 colour (10 YR 5/1) derives from the ashes that are found in and around this feature (a hearth)  
74 on the roof of level Bj/13.

75

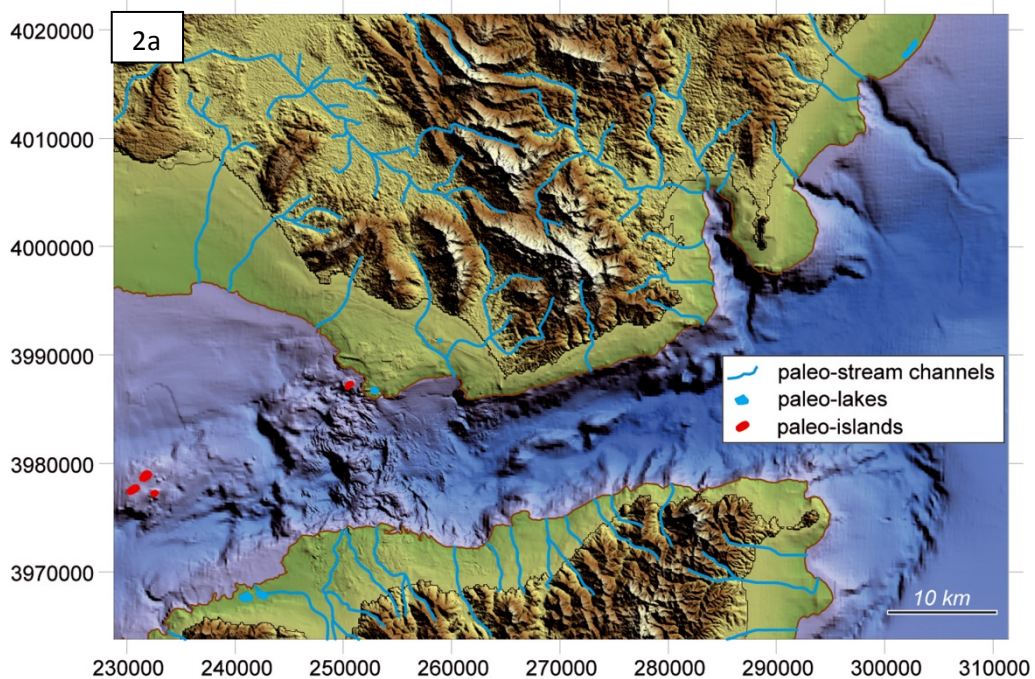

76

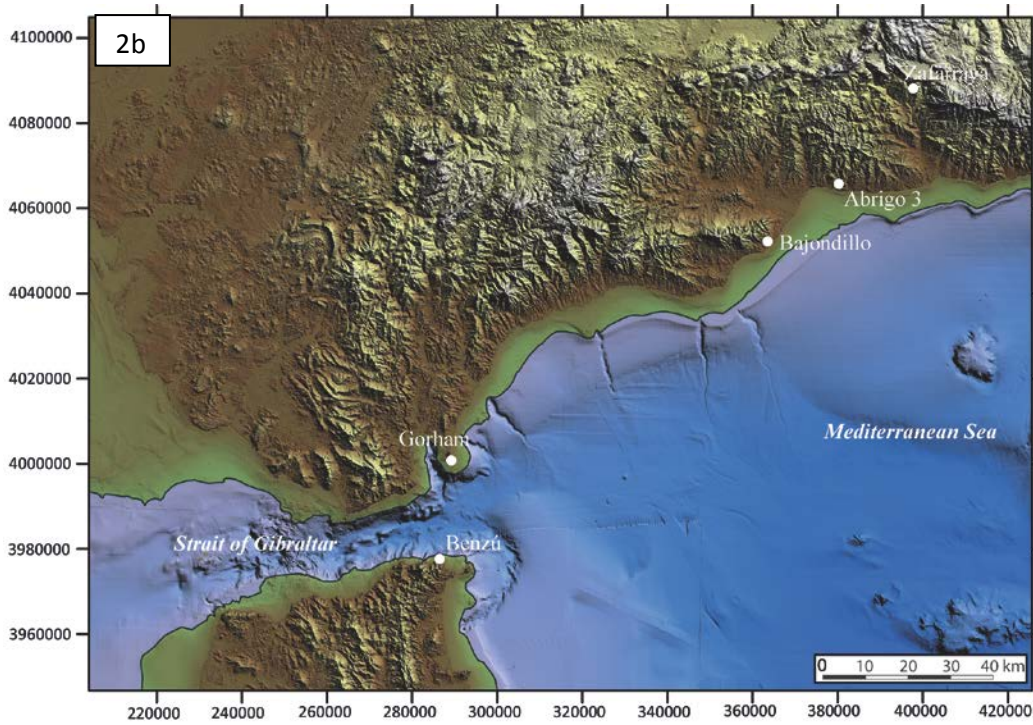

77

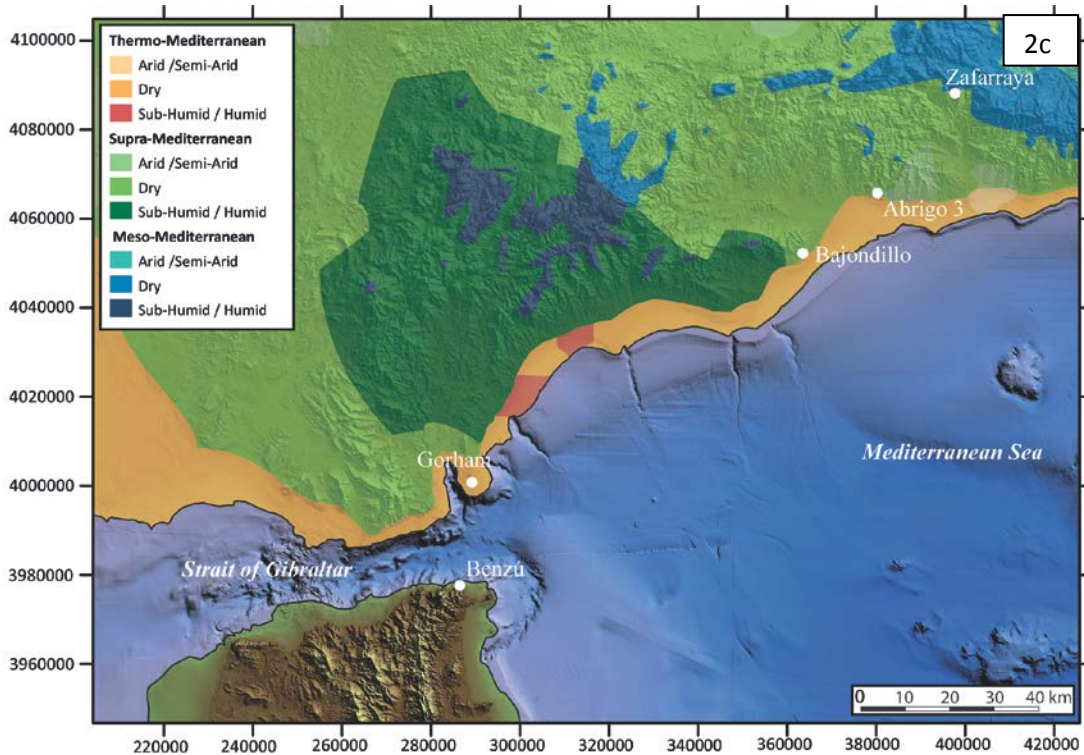

78

79

80 **Supplementary Figure 2. a.** Palaeogeographical reconstruction of the Strait of Gibraltar at  
 81 -85 msl. Areas in red represent emerged islands, areas in blue coastal lacustrine areas, and  
 82 blue lines river drainage systems. The present coast is represented by a continuous black line.  
 83 The presently submerged coastal corridor essentially corresponds to the area marked in green.



84 **b.** Strait of Gibraltar with coastline contours estimated from mean sea level values at -85 m,  
85 the most common situation during Marine Isotope Stage 3.

86 **c.** Bioclimatic zones of the southernmost Iberian Peninsula during a glacial cool-dry stage  
87 (modified from Jennings et al., 2011) with location of archeological sites mentioned in the text.

88 High relief and other factors configure a potential bioclimatic “refugium” (Jennings et al., 2011).

89 Figures created using Global Mapper v.16 software see acknowledgements chapter for used  
90 database.

91

92

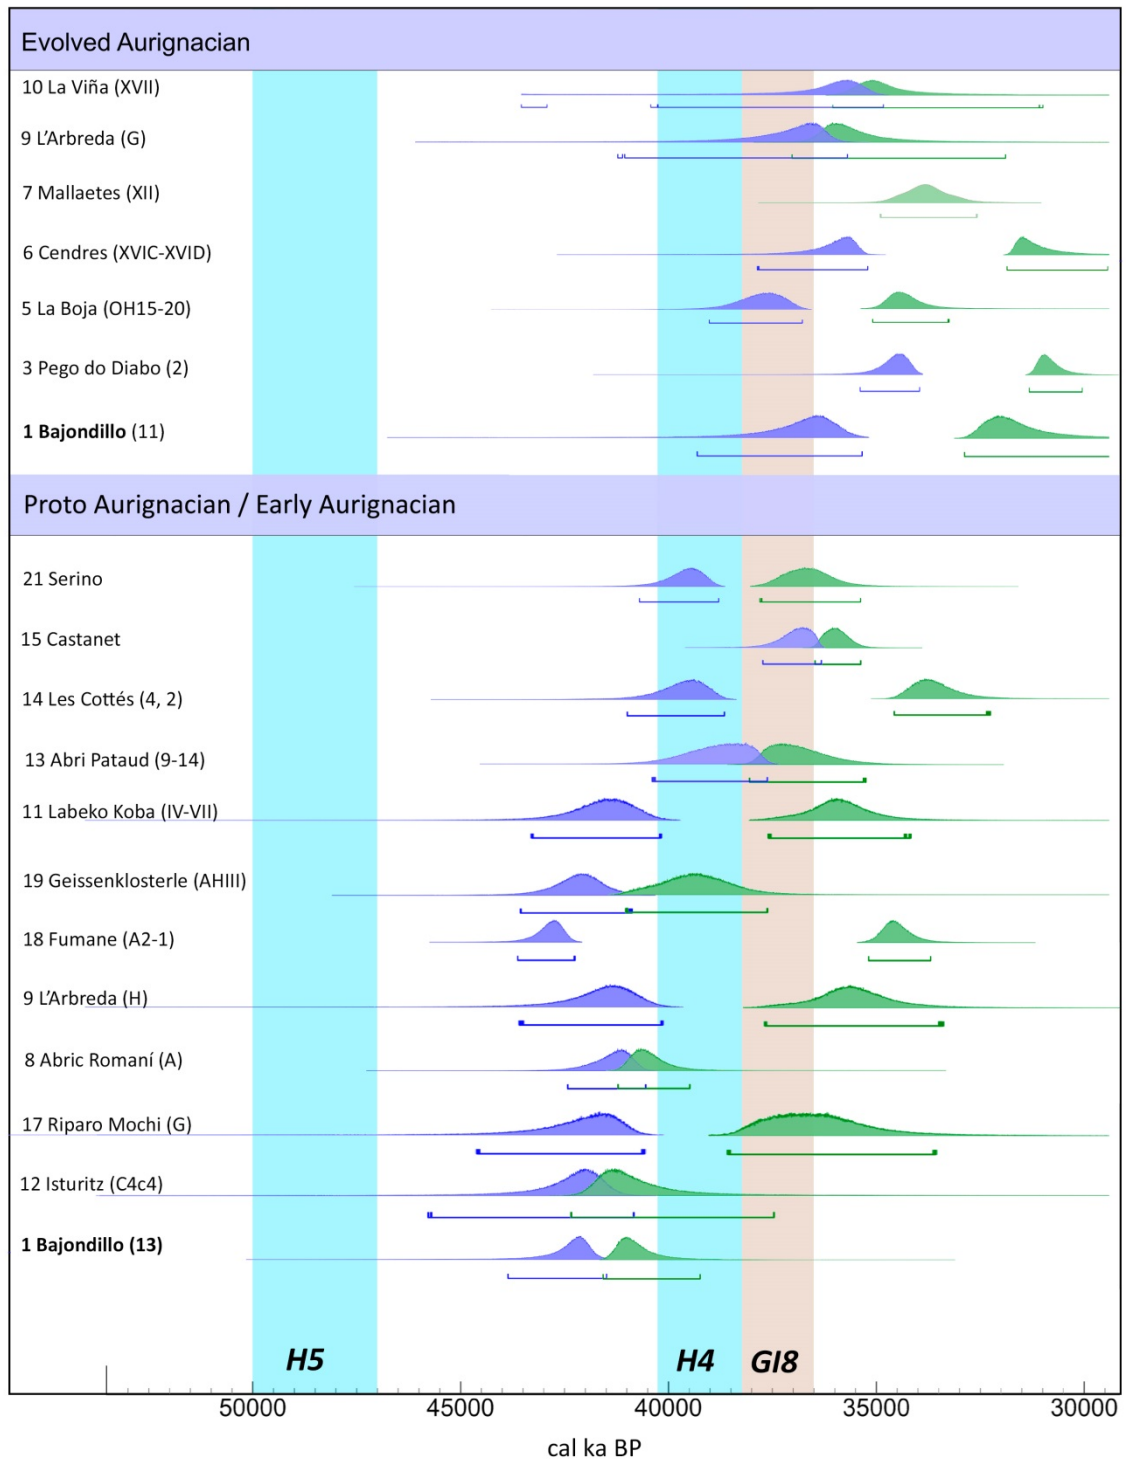

93  
 94 **Supplementary Figure 3.** Boundaries of techno-complexes from selected sites (Location  
 95 numbers as in Fig. 1) with analyzed layer in parentheses, start (blue) and end (green). Light  
 96 blue bar: Heinrich Stadials 4 and 5; Light brown bar: Glacial Interstadial 8. Figure taken from  
 97 Oxcal 4.3.2 (Bronk Ramsey 2017). All dates calibrated with Intcal13 or Marine13 at range of  
 98 95.4% of probability (Reimer et al. 2013). References: Wood et al., 2014, Reimer et al., 2013,  
 99 Bronk Ramsey, 2017, Camps and Higham, 2012, Higham et al., 2010 and 2012, Douka et al.,

100 2012, Talamo et al. 2012, White et al. 2012, Soressi et al., 2012, White et al., 2012, Szmidt et  
101 al., 2010, Villaverde et al., 2017.

102

### 103 **LITHIC INDUSTRIES**

104 The lithic industries from Bajondillo cave levels Bj/14, Bj/13 and Bj/11 analyzed thus far  
105 amount to 4,197 items (see SI, Table 2).

106 The 353 items from Bj/13 include 1 hammer, 55 of cortical removal, 107 products of *débitage*  
107 (63 whole and 44 fragmented), 6 supports with Siret accidental break, 6 cores, 14 chunks, 16  
108 splinters, 132 debris (artifacts smaller than 1.5 cm<sup>2</sup>), 6 thermal fracture flakes and 10 tools (see  
109 Cortés, 2007).

110 Raw materials were flint (94.3%) and quartzite (5.7%). Both were collected from existing  
111 Neogene conglomerate outcrops <5km radius around the cave. Since a substantial part of this  
112 industry was associated to a hearth (i.e. Bj/12), almost half of the Bj/13 material was thermo-  
113 altered (46.7% vs. the 30.2% recorded for Bj/14). Thermoalteration explains why a significant  
114 (34.9%) proportion of the supports were fragmented, in particular the thinnest items [i.e.  
115 blades/bladelets: 18.9% (Bj/14); 36.4% (Bj/13); 36.8% (Bj/11)].

116 As for butts, 43.4% of Bj/13 items exhibited a nil or scarce preparation of the striking platform  
117 (i.e. cortical and flat) as opposed to 23.1% of dihedral and faceted preparations, together with  
118 other less diagnostic types of butts (snaps and punctiforms: 30%; linear: 3.5%). The  
119 morphometric features of the proximal portions of the items indicate the use of both hard and  
120 soft hammers. By categories, the 63 whole *débitage* supports include 37 flakes, 15  
121 blades/bladelets and 11 maintenance and rejuvenation flakes of cores for blades. The industry  
122 of Bj/13 is of reduced dimensions, 73.1% of the lengths and widths falling below 30mm.

#### 123 a) Unretouched material

124           Stage 1 (Raw material collecting). Only an elongated boulder used as a hammer is  
125 recorded.

126           Stage 2 (Preparation and initial shaping out of cores). 41 cortex removal items (39.4%  
127 of the unretouched material that is complete).

128

| Level<br>Category                   | Bj/14        |            |              |            | Bj/13      |           |            |            | Bj/11        |            |              |            |
|-------------------------------------|--------------|------------|--------------|------------|------------|-----------|------------|------------|--------------|------------|--------------|------------|
|                                     | W            | f          | Σ            | %          | W          | f         | Σ          | %          | W            | f          | Σ            | %          |
| Hammer/tes-<br>ted nodules          | 3            | 2          | 5            | 0.3        | 1          | 0         | 1          | 0.3        | -            | -          | 0            | 0.0        |
| Cortical<br>flakes                  | 207          | 110        | 317          | 16         | 41         | 14        | 55         | 16         | 116          | 81         | 197          | 11         |
| Flakes*                             | 309          | 133        | 442          | 22         | 37         | 25        | 62         | 18         | 106          | 121        | 227          | 12         |
| Blades-<br>Bladelets*               | 34           | 31         | 65           | 3.3        | 15         | 16        | 31         | 8.8        | 36           | 89         | 125          | 6.8        |
| Flakes of<br>rejuvenation<br>B/b*   | 0            | 0          | 0            | 0          | 11         | 3         | 14         | 4.0        | 53           | 32         | 85           | 4.6        |
| Siret<br>accidental<br>break        | -            | 14         | 14           | 0.7        | -          | 6         | 6          | 1.7        | -            | 9          | 9            | 0.5        |
| Core for<br>flakes                  | 36           | 9          | 45           | 2.3        | 2          | 1         | 3          | 0.8        | 10           | 14         | 24           | 1.2        |
| Core for<br>blades/blade<br>lets    | 0.0          | 0.0        | 0.0          | 0.0        | 3          | 1         | 4          | 1.1        | 12           | 10         | 22           | 1.3        |
| Chunks                              | 67           |            | 67           | 3.4        | 13         |           | 13         | 3.7        | 50           |            | 50           | 2.7        |
| Splinters                           | 67           |            | 67           | 3.4        | 16         |           | 16         | 4.5        | 83           |            | 83           | 4.5        |
| Debris                              | 852          |            | 852          | 43         | 132        |           | 132        | 37         | 918          |            | 918          | 50         |
| Thermic<br>flakes                   | 19           |            | 19           | 1.0        | 6          |           | 6          | 1.7        | 46           |            | 46           | 2.5        |
| Tools                               | 190          | 16         | 106          | 5.3        | 9          | 1         | 10         | 2.8        | 37           | 22         | 59           | 3.2        |
| <b>Σ</b>                            | <b>1,684</b> | <b>315</b> | <b>1,999</b> | <b>100</b> | <b>286</b> | <b>67</b> | <b>353</b> | <b>100</b> | <b>1,467</b> | <b>378</b> | <b>1,845</b> | <b>100</b> |
| *Σ <i>Débitage</i><br>full product. | 343          | 164        | 507          | 25         | 63         | 44        | 107        | 30         | 195          | 242        | 437          | 30         |

129 **Supplementary Information Table 2.** Lithic industries from Bj/14 to Bj/11 levels. W (whole), f  
130 (fragment), B (blade), b (bladelet).

131

132 Stage 3 (*Débitage*). Two technological concepts, one aimed at obtaining flakes (whole = 52.6)  
133 and another for obtaining blades and bladelets (w = 47.4%) are recorded. The latter system  
134 includes maintenance and rejuvenation of blades/bladelets cores (w = 17.5%, w + f = 13.1%)  
135 and specific cores. This is one of the key elements arguing for an Upper Palaeolithic technology  
136 at Bj/13.

137 The Elongation index (Ie) of flaked products evidences a collection dominated by flakes, but  
138 also one where the leptolithic elements reach values above 20%, whereas the thickness index  
139 defines a set dominated by flat and very flat supports.

140 Flaked surfaces with a significant amount of cortex (>25%) amount to 42.3% as opposed to  
141 items with marginal cortex (<25%: 57.7%). Equally significant is the fact that fully half of the  
142 pieces feature cortex. This fact agrees with the small size of the industries and the raw  
143 materials used, as well as with the *débitage* of the lithic raw materials and the abandonment  
144 of a large part of the supports obtained at the site.

145 The morphologies of the striking platforms coincide with the changes experienced in the  
146 schemas of *débitage*. Cortical+flat butts ( $\Sigma$ 46.2%) are dominant whereas linear, punctiform and  
147 snap butts, largely linked to blades/bladelets production, reach significant frequencies  
148 ( $\Sigma$ 33.7%). This contrasts with the reduction of the faceted/dihedrals forms ( $\Sigma$ 23.1%). Butts  
149 feature clear indications of the simultaneous use of hard and soft hammers.

150 b) Technological analysis

151 Stage 1 (Collection of raw material). The collection of boulder and rock fragments maintains  
152 the preference for flint (>90%) with quartzite always in medium-small volumes (<90-80mm<sup>3</sup>).

153 Stage 2. (Supports from cortex removal and shaping out of the cores). The 55 pieces (41 whole  
154 and 14 fragments) assigned to this category (15.6% of the industry, Supplementary Table 2)  
155 systematically pursue the elimination of as much cortex as possible. From the initial stages of  
156 core reduction we find items clearly linked with the preparation of blades/bladelets cores from  
157 unipolar convergent removals.

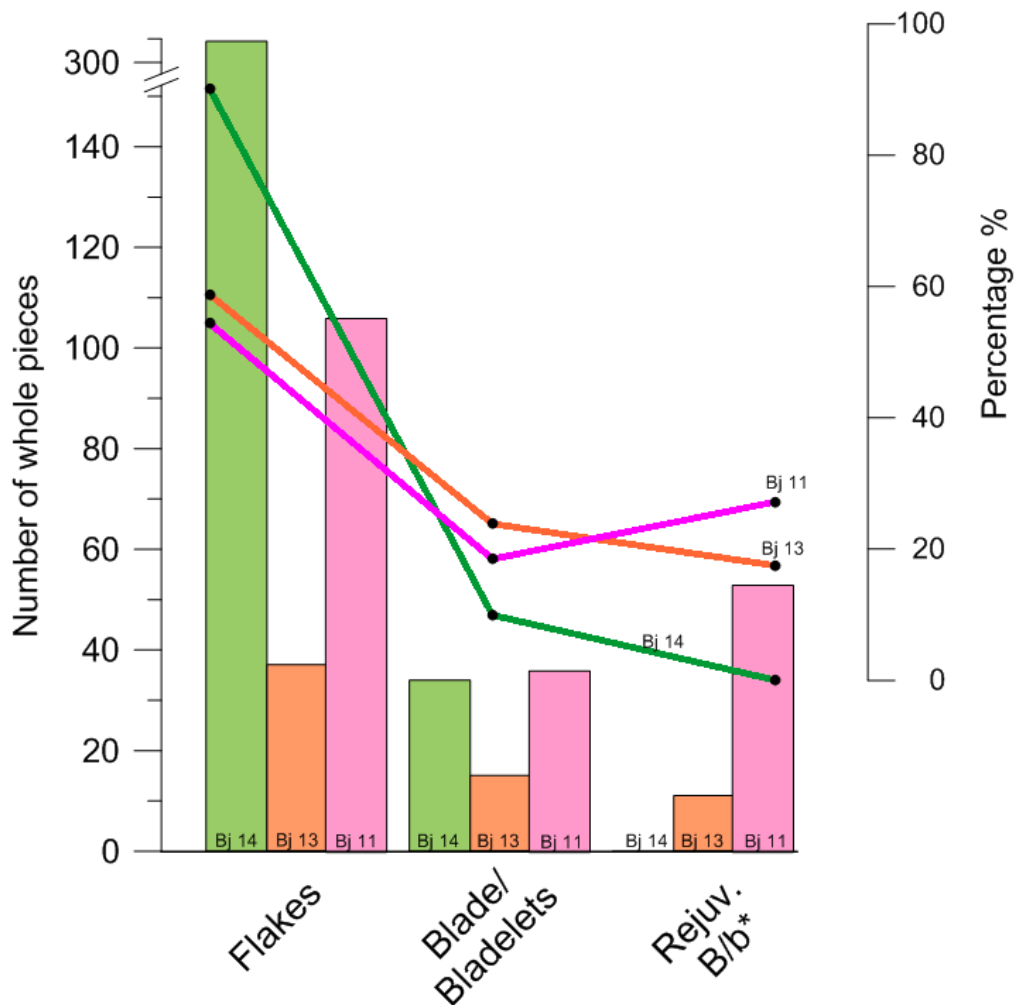

158

159 **Supplementary Figure 4.** *Débitage* full production of Flakes, Blade/bladelets(B/b\*),  
 160 Rejuvenation of Blade/bladeletes (Rejuv. B/b\*) for Bajondillo Bj/14 (green bars), Bj/13 (orange  
 161 bars) and Bj/11 (pink bars) archeological levels, and percentages % (continuous lines). Notice  
 162 break at Y-axis = 150.

163

164 Stage 3 (*Débitage*)

165 a) Flakes. 62 items (17.6 %, Supplementary Table 2). Within this group one finds flakes with  
 166 more balanced proportions / contours and centered morphological axes, and flakes with  
 167 localized plunging, irregular profiles and transversal deviated symmetry axes. The latter often  
 168 originated in the partial re-arrangements of cores or as flakes of transit between series of  
 169 preferential removals. The direction of the negatives on the dorsal faces indicate similar  
 170 frequencies for the bilateral *débitage* and scarce use of the distal striking platform. Most of the  
 171 pieces featured less than four removals. Likewise, 2 Janus flakes (1 fractured), of very irregular

172 design, correspond to fortuitous elements rather than to a specific *débitage*, as in Bj/14 (4% of  
173 *débitage* from Janus/Kombewa well-formalized cores and employees to make 5 retouched  
174 tools).

175 b) Blades and bladelets (8.8%, Supplementary Table 2). The Elongation index at Bj/13 yields a  
176 *ca.* 3:1 flake to blade/bladelet ratio (i.e. 76%:24%). Nevertheless, from a strict technological  
177 standpoint, blades/bladelets represent 14.4% of whole supports (sum of Cortical flakes+ flakes  
178 + B/b + Flakes of Rev. B/b\*) Supplementary figure 4). Indeed, eliminating Stage 2 items, flakes  
179 of rejuvenation of cores and accidental break Siret, about one third of the 52 remaining Stage  
180 3 *débitage* elements (sum of flakes + B/b + Flakes of Rev. B/b\*) were blades/bladelets (28.8%).  
181 Longitudinal sections are predominantly convex and sinuous. From this technological  
182 standpoint, this is the first time in the stratigraphic sequence that intentional elongated  
183 supports are documented. The presence of cores for blades/bladelets and their corresponding  
184 flakes of maintenance/rejuvenation in Bj/13 complete the range of technological items that  
185 characterize an Upper Palaeolithic industry. Still, it is the combined presence of certain  
186 elements, rather than just their presence, what constitutes the crucial novelty revealing the  
187 Upper Palaeolithic nature of Bj/13. Of the generally recognized width categories,  
188 blades/bladelets at Bj/13 fall into the three, namely 6-8mm (12%), 8-10mm (22%) and 10-  
189 12mm (66%).

190 c) Cores. All seven identified cores (1.9% of the industry, Supplementary Table 2) are executed  
191 in flint. One is amorphous and a second one possibly represents an initial stage of a core for  
192 blades. Three cores are for obtaining flakes of crossed or centripetal management. Another is  
193 one of sub-pyramidal concept (Fig. 2, Bj/13.16). This core, executed on a nodule, has a flat and  
194 concave striking platform and documents the technology for bladelet production at Bj/13. The  
195 last of the cores is fragment (Fig. 2, Bj/13.18), and could correspond to this same sub-  
196 pyramidal concept.

197 One final category of items signaling blades/bladelets technology is that of maintenance and  
198 rejuvenation flakes of cores (i.e. debordant flakes, crested flakes, etc.).

199 A technological comparison of Bj/13 with MP reveals a clear break. In this way, the combined  
200 frequency of blades and bladelets ( $l_e \geq 2$ ) for the whole MP sequence reaches to 15.1% of full  
201 production *débitage* (Bj/17: 2.8%, Bj/16: 2.6%, Bj/15: 3.5%, Bj/14: 6.2%). In Bj/13 this  
202 frequency raises to 14.4% (Supplementary Table 2). These frequencies are not strictly  
203 comparable because:

204 - In the case of blades/bladelets, these are all chance products of flake production without any  
205 technological aim in MP levels. Nevertheless, restricting comparisons to typometrical criteria,  
206 Bj/13 exhibits an  $\Delta 232\%$  increase in blades/bladelets when compared to Bj/14. The actual  
207 difference is, in fact, larger when one considers that in Bj/14, 10 of the 18 products with an  $l_e \geq$   
208 2 are cortex removal flakes with accidental extensions. For such reason, typometric blades  
209 would only total 8 items in Bj/14 (i.e. 3.4% of full production *débitage*) raising the  
210 technological differences between both levels (>240%).

211 - The presence of 14 maintenance and rejuvenation flakes of cores for blades/bladelets (core  
212 tablet, overhands, flanks and crests). These account for 10.6% of the industry and 17.5%  
213 (whole items of *débitage*). This category is absent in all the MP levels from Bajondillo.

214 Stage 4. (Retouched tools). A total of 10 items (2.8% of the industry, Supplementary Table 2),  
215 including a flat nose end-scraper, a borer, a continuous retouched blade, a scraper, a notch, a  
216 denticulate, a complete and a fragmented *ecaillée*, a diverse and a natural back knife are  
217 recorded at Bj/13. Except for the notch and denticulate made on quartzite, the remaining tools  
218 were made of flint. In typometrical terms, except for a flake on which the scraper was made  
219 and a >30mm blade fragment, the remaining tools were 20-50mm wide, with lengths ranging  
220 between 10-30mm and thicknesses between 4-12mm. Butts feature three dihedral, two  
221 faceted, one crushed and two removed.

222 As for the selection of supports, 6 flakes (3 from Stage 2), a blade, two rejuvenation flakes of  
223 blade cores and a *chunk* are recorded.

224 The most relevant tool in the Bj/13 collection is a nose end-scraper with its retouched front  
225 placed on one side of the flake (Fig. 2, Bj/13.1). This peculiarity is also documented in the  
226 Aurignacian industries of Bajondillo. Specifically, in 12 out of the 20 burins and end-scrappers  
227 from Bj/11 the retouch application does not coincide with the distal tip of the piece. At Bj/11,  
228 6 out of the 12 end-scrappers in which the location of the retouching could be identified with  
229 respect to a deviated axis, feature a distal retouching and in 2 of them the fronts are deviated.  
230 In 3 end-scrappers the retouch is proximal and in the remaining ones lateral. The latter, as in  
231 Bj/13, happen to be nose end-scrappers. Therefore, the lateral disposition of the end-scraper  
232 front from Bj/13 conforms with the general pattern documented at Bj/11.

233 The tool collection also features a borer with marginal abrupt retouch on a little flake (Fig. 2,  
234 Bj/13.2), a distal fragment of a blade with marginal scaled retouch extracted from a prismatic



235 core with converging removal (Fig. 2, Bj/13.4), and a double scraper on a flake with convergent  
236 negatives of removal. The latter has a faceted butt and was possibly broken using a soft  
237 hammer. Its origin can be either a core for flakes managed with a recurrent convergent  
238 scheme or a core for blades with a slightly convex transversal arc.

239 Two quartzite tools are documented in Bj/13. One is a deep clactonian notch (Fig. 2, Bj/13.5),  
240 the other a clactonian denticulate over flake with lateral plunging. At Bj/11 notches and  
241 denticulates constitute the second typological group in importance, behind end-scrapers.

242 Two splintered pieces were possibly used as wedges. These tools also constitute a novelty of  
243 Bj/13 as they do not appear in any of the MP levels.

244 Lastly, we have a cortical flake with a deep simple retouching (Fig. 2, Bj/13.5). The fracture of  
245 its right upper angle forces us to leave open at this moment its typological assignment  
246 although we note similarities on the side edge of the piece with a nose end-scraper.

247 To summarize, although the Bajondillo cave lithic industry collection is small, at Bj/13 the tools  
248 of diagnostic value, the technological system recognized on account of blades and bladelets,  
249 cores and their rejuvenation flakes, are discordant beyond question with the pattern  
250 documented in the MP and conform instead fully with an UP (Aurignacian) technology  
251 featuring clear connections with Bj/11.

252

253

#### 254 **SUPPLEMENTARY INFORMATION REFERENCES**

255

256 Barton, R.N.E. et al., 2007. Abrupt climatic change and chronology of the Upper Palaeolithic in  
257 northern and eastern Morocco, in P. Mellars, K. Boyle, O. Bar-Yosef, C. Stringer (eds.),  
258 Rethinking the Human Revolution: New Behavioral & Biological Perspectives on the Origins  
259 and Dispersal of Modern Humans, Research Monographs of the Macdonald Institute, pp.  
260 177-186. Cambridge.

261 Bataille, G. et al., 2018. Living on the edge – A comparative approach for studying the  
262 beginning of the Aurignacian. Quaternary International 474, 3-29.

263 Bergadà, M.M. and Cortés, M. 2007. Secuencia estratigráfica y sedimentaria, in Cortés, M. (ed.  
264 and coord.), Cueva Bajondillo (Torremolinos). Secuencia cronocultural y paleoambiental del  
265 Cuaternario reciente en la Bahía de Málaga. 93-138. CEDMA, Málaga.

266 Bronk Ramsey, C. 2017. Bayesian analysis of radiocarbon dates. *Radiocarbon* 51, 337-360.

267 Camps, M. and Higham, T.F.G., 2012. Chronology of the Middle to Upper Palaeolithic transition  
268 at Abric Romaní, Catalunya. *J. Hum. Evol.* 62, 89-103. doi:10.1016/j.jhevol.2011.10.010

269 Cortés-Sánchez, M. 2007. Las industrias líticas del Paleolítico medio y superior, in Cortés, M.  
270 (ed. & coord.), Cueva Bajondillo (Torremolinos). Secuencia cronocultural y paleoambiental  
271 del Cuaternario reciente en la Bahía de Málaga. 171-446. CEDMA, Málaga.

272 Cortés-Sánchez, M. et al., 2011. Earliest known use of marine resources by Neanderthals. *PLoS*  
273 *One* 6 (9), e24026. <http://dx.doi.org/10.1371/journal.pone.0024026>.

274 Douka, K. et al., 2012. A new chronostratigraphic framework for the Upper Palaeolithic of  
275 Riparo Mochi (Italy). *J. Hum. Evol.* 62, 286-299.

276 Douka, K. et al., 2014. The chronostratigraphy of the Haua Fteah cave (Cyrenaica, northeast  
277 Libya). *Journal of Human Evolution* 66: 39-63.  
278 <http://dx.doi.org/10.1016/j.jhevol.2013.10.001>

279 Ehlers, J. et al., (eds.), 2011. Quaternary Glaciations - Extent and Chronology vol. 15, A closer  
280 look. Elsevier.

281 Fu, Q. et al., 2016. The genetic history of Ice Age Europe. *Nature*, 534(7606), 200-205.  
282 doi:10.1038/nature17993

283 Higham, T.F.G. et al., 2010. Chronology of the Grotte du Renne (France) and implications for  
284 the context of ornaments and human remains within the Châtelperronian. *Proc. Natl. Acad.*  
285 *Sci.* 107, 20234-20239. doi:10.1073/pnas.1007963107

286 Higham, T.F.G. et al., 2011. The earliest evidence for anatomically modern humans in  
287 northwestern Europe. *Nature* 479: 521-524. doi:10.1038/nature10484.

288 Higham, T.F.G. et al., 2012. Testing models for the beginnings of the Aurignacian and the  
289 advent of figurative art and music: the radiocarbon chronology of Geißenklösterle. *J. Hum.*  
290 *Evol.* 62, 664-676. doi:10.106/j.jhevol.2012.03.003.

291 Hublin, J.-J. 2015. The modern human colonization of western Eurasia: when and where?  
292 *Quaternary Science Reviews* 118: 194-210. doi: 10.1016/j.quascirev.2014.08.011

293 Hublin, J.-J. et al., 2017. New fossils from Jebel Irhoud, Morocco and the pan-African origin of  
294 *Homo sapiens*. *Nature* 546, 289-292. doi:10.1038/nature22336

295 Jennings, R. et al., 2011. Southern Iberia as a refuge for the last Neanderthal populations.  
296 Journal of Biogeography 38: 1873–1885. doi:10.1111/j.1365-2699.2011.02536.x

297 Ramos, J. et al., 2008. The Benzú rockshelter: a Middle Palaeolithic site on the North African  
298 coast. Quaternary Science Reviews 27 (23-24); 2210-2218.  
299 doi:10.1016/j.quascirev.2008.08.030.

300 Reimer P.J. et al., 2013. IntCal13 and Marine13 radiocarbon age calibration curves 0–50,000  
301 years cal BP. Radiocarbon 55(4): 1869–1887. doi:10.1038/nature16544.

302 Siani, G. et al., 2000, Radiocarbon reservoir ages in the Mediterranean Sea and Black Sea:  
303 Radiocarbon , 42, 271–280.

304 Szmidt, C.C. et al., 2010. AMS 14C dating the Proto-Aurignacian/Early Aurignacian of Isturitz,  
305 France. Implications for Neanderthal-modern human interaction and the timing of technical  
306 and cultural innovations in Europe. J. Archaeol. Sci. 37, 758-768.  
307 doi:10.1016/j.jas.2009.11.06

308 Talamo, S. et al., 2012. A radiocarbon chronology for the complete Middle to Upper  
309 Palaeolithic transitional sequence of Les Cottés (France). J. Archaeol. Sci. 39, 175-183.  
310 doi:10.1016/j.jas.2011.09.019

311 Tafelmaier, Y., 2017. Technological variability at the beginning of the Aurignacian in northern  
312 Spain. Implications for the Proto- and early Aurignacian distinction. Wissenschaftliche  
313 Schriften des Neanderthal Museums, vol. 9 Neanderthal Museum, Mettmann.

314 Villaverde, V. et al., 2017. The early Upper Palaeolithic of Cova de les Cendres (Alicante, Spain),  
315 Quat. Int., in press. <https://doi.org/10.1016/j.quaint.2017.11.051>

316 White, R. et al., 2012. Context and dating of Aurignacian vulvar representations from Abri  
317 Castanet, France. Proc. Natl. Acad. Sci. 109, 8450-8455. doi: 10.1073/pnas.1119663109

318 Wood, R.E. et al., 2014. The chronology of the earliest Upper Palaeolithic in northern Iberia:  
319 New insights from L'Arbreda, Labeko Koba and La Viña. *Journal of Human Evolution* **69**, 91-  
320 109. doi:10.1016/j.jhevol.2013.12.017.

321 Zilhão, J. et al., 2010. Pego do Diabo (Loures, Portugal): Dating the Emergence of Anatomical  
322 Modernity in Westernmost Eurasia. PLoS ONE 5(1): e8880.  
323 doi:10.1371/journal.pone.0008880

324 Zilhão, J. et al., 2017. Precise dating of the Middle-to-Upper Paleolithic transition in Murcia  
325 (Spain) supports late Neandertal persistence in Iberia. *Helinyon* **3**, e00435.  
326 doi:10.1016/j.heliyon.2017.e00435.

327

328

## 329 **Acknowledgements**

330 This study is sponsored by Projects HAR2013-44269-P and HAR2016-77789-P from the Spanish  
331 *Ministerio de Economía y Competitividad*. Fieldwork authorized by *the Consejería de Cultura*  
332 from the *Junta de Andalucía* (Spain). This paper is a contribution of Project HUM-949 (Tellus.  
333 Prehistory and Archaeology in the South of Iberia) and the Interdisciplinary Center for  
334 Archaeology and the Evolution of Human Behaviour. Chris Stringer's research is supported by  
335 the Calleva Foundation and the Human Origins Research Fund. A.G.-A. was also supported by a  
336 Ramón y Cajal Fellowship RYC-2015-18966 of the Spanish Government (Ministerio de  
337 Economía y Competitividad). Supplementary Figure 2 was created by us using Global Mapper  
338 v.16 software and authorized database: ASTER GDEM v2 Worldwide Elevation Data (1 arc-  
339 second Resolution) (<https://gdex.cr.usgs.gov/gdex/>); EMODnet Bathymetry data (7.5 arc-  
340 second Resolution) (<http://portal.emodnet-bathymetry.eu/?menu=19>); Alboran Sea  
341 bathymetry (100 m resolution) Instituto Español de Oceanografía (IEO)-Secretaría General de  
342 Pesca Marítima and Gibraltar Strait (25 m resolution) Sociedad Española de Estudios para la  
343 Comunicación Fija a través del estrecho de Gibraltar, SA (SECEGSA).

## 344 **Authors Contribution**

345 Conceived and designed the experiments: MC-S. Analyzed the data: MC-S, FJJ-E, MDS-V, CS,  
346 COL, MCLF, JLVP, JAR-C, AG-A, RPG, AMG, NO, AM-M. Wrote the paper: MC-S, FJJ-E, CS, AM-M.  
347 Archaeology and lithic technology: MC-S, MDS-V, COL, RPG. Archaeozoology and taphonomy:  
348 AM-M, MC-S, MCL-F, JLV-P. Geology and Paleoclimatology: FJJ-E, AG-A, AMG, NO

349

## 350 **Author Information**

351 Reprints and permissions information is available at [ww.nature.com/reprints](http://ww.nature.com/reprints)". Authors declare  
352 no competing financial interests. Correspondence and requests for materials should be  
353 addressed to [fjjspejo@ugr.es](mailto:fjjspejo@ugr.es).
